# Supplementary material
Source: bioRxiv or medRxiv preprint supplement (https://www.biorxiv.org/highwire/filestream/15184/field_highwire_adjunct_files/2/054924-3.pdf)

● CMT1 ● CMT2 ● CMT3 ● CMT $\epsilon$  monocot+magnoliid

A

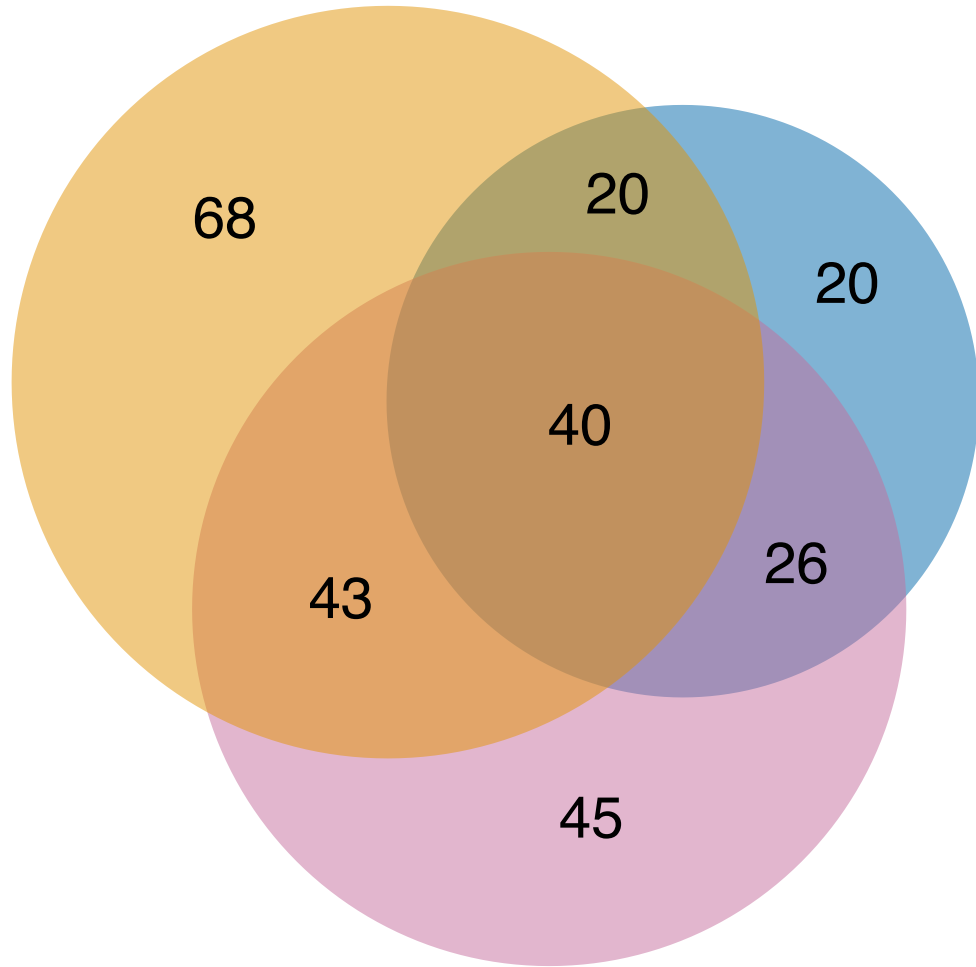

B

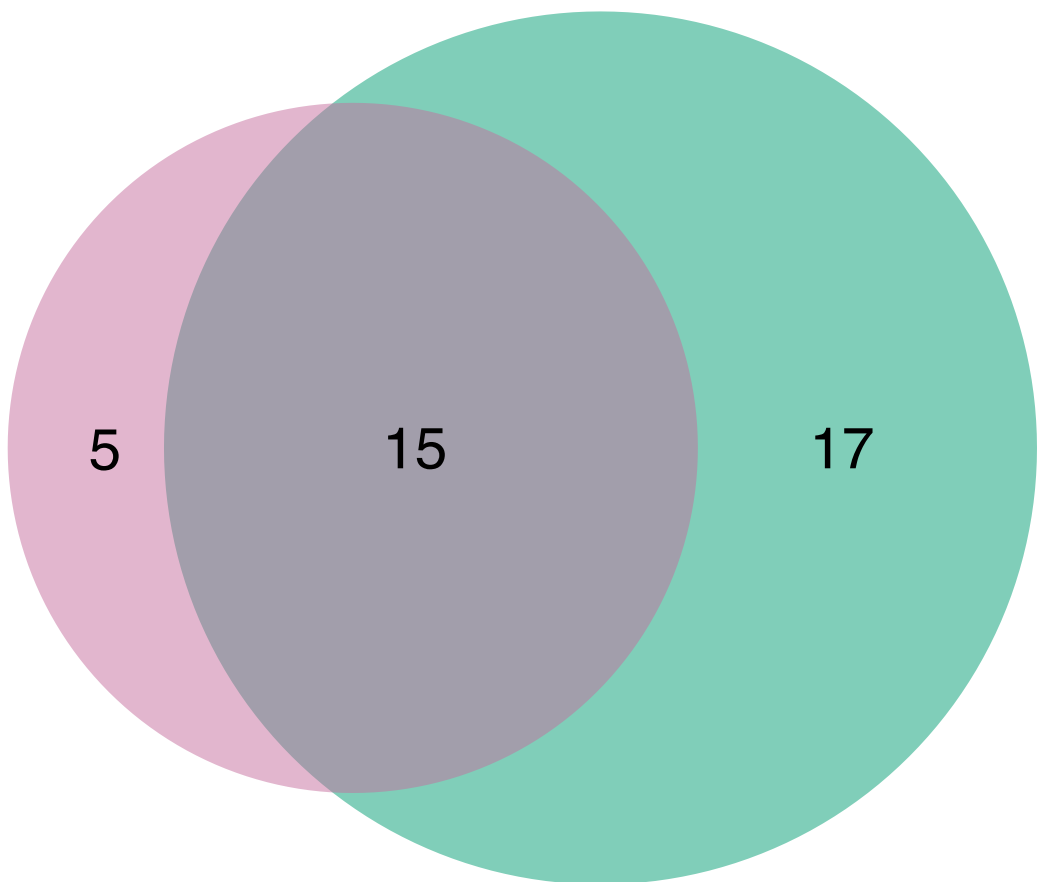

Supplement: Supplementary file [file 054924-3.pdf]
